# Supplementary material for: Co-phagocytosis of VEGFA with HER2-overexpressing cancer cells induced by HER2-VEGFA–bispecific antibodies improves antitumor responses
Source: JCI journal article supplement (doi:10.1172/jci.insight.194494), 2025-09-04

# Unedited blot and gel images

Figure 1B, part 1

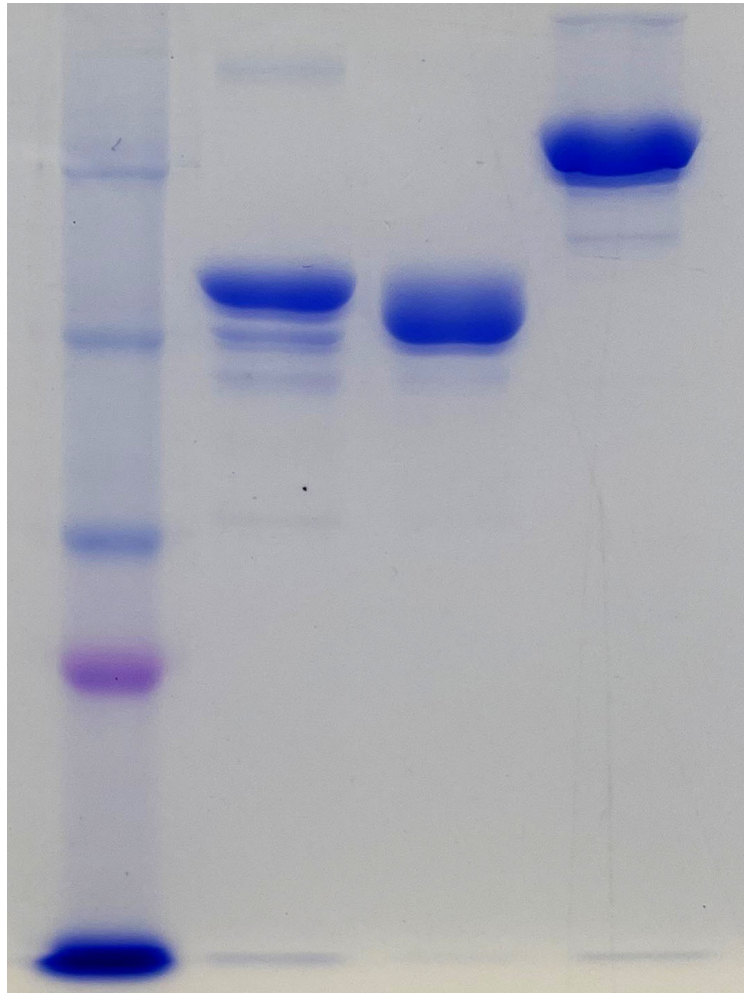

Figure 1B, part 2

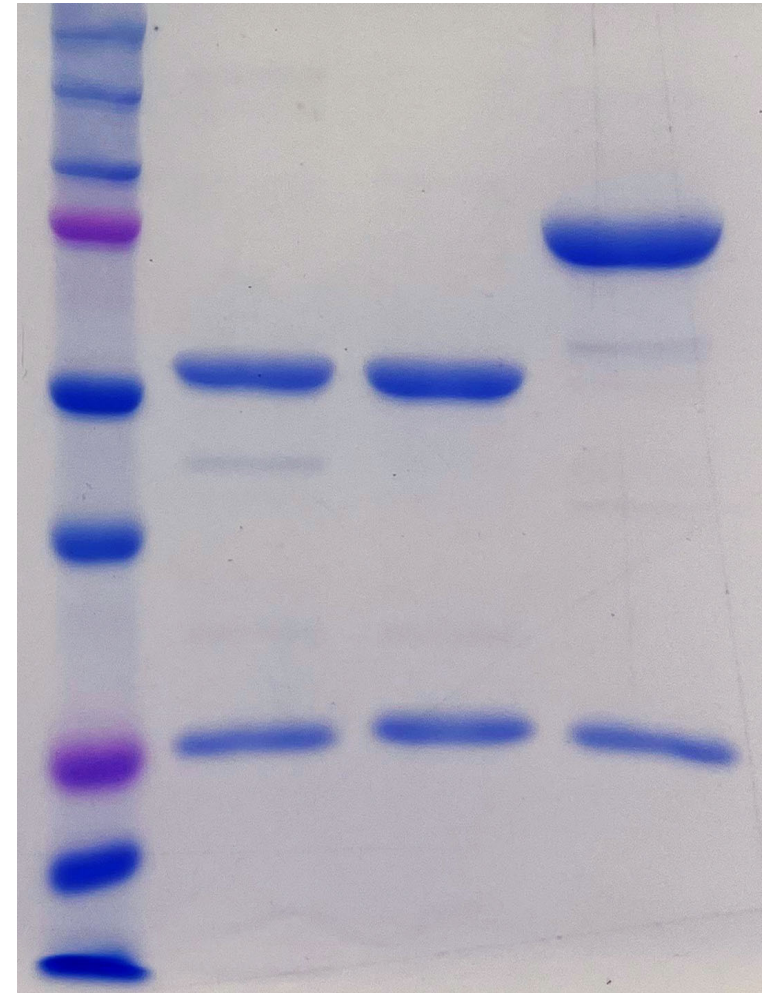

Supplement: sd2 [file 2]
